# Supplementary material for: Pax8 controls thyroid follicular polarity through Cadherin-16
Source: Oxford University Press journal article supplement (doi:10.1242/jcs.184291), 2016-01-01
Supplement: jcs184291supp.pdf [file jcs184291supp.pdf]

## SUPPLEMENTARY FIGURES

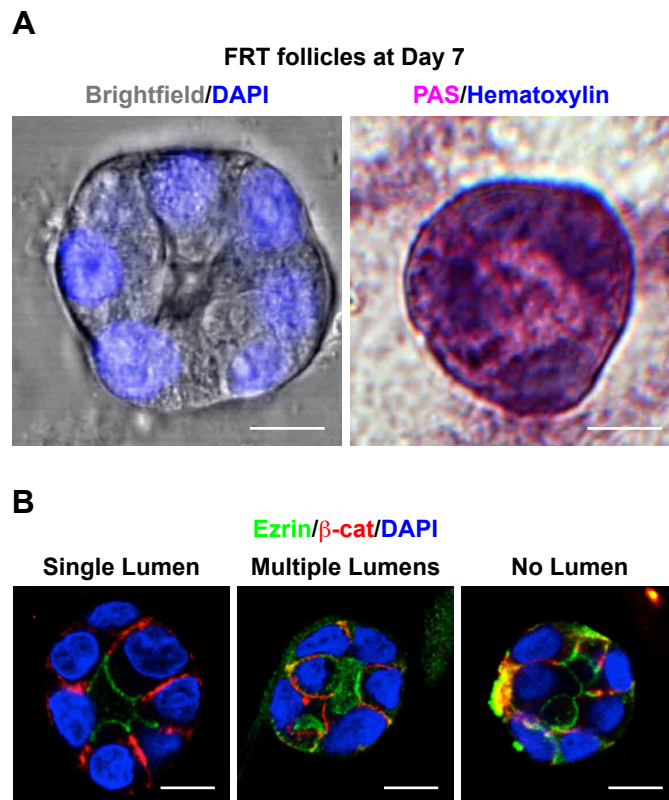

**Fig. S1. Lumen formation during 3D FRT follicle organization** (A) Brightfield images of 3D spherical, follicular structures derived from FRT cells after 7 days of 3D growth in Matrigel. Left panel: Representative brightfield and confocal microscopy merged image in which FRT follicle-like structures are characterized by a single layer of cells (nuclei stained with DAPI in blue) that surround a central lumen free from cells. Right panel: Representative brightfield image showing the follicular lumen filled with glycoproteins visualized by periodic acid-Schiff (PAS) staining (magenta). Nuclei in PAS samples are stained with hematoxylin (blue). Scale bars are 10  $\mu$ m. (B) Different phenotypes of FRT structures regarding lumen formation were identified by examining them through the z-axis at the fifth day of growth. Follicle-like structures with single, cleared internal lumen were characterized as normal (left panel). Follicle-like structures with multiple lumens were identified by the presence of several small, apically lined lumens (middle panel). Some structures were cell aggregates without visible lumen due to loss of apical-basal polarity (right panel). Structures were fixed and stained for Ezrin (green) and  $\beta$ -catenin (red). Representative confocal middle z-sections are shown. All nuclei were stained with DAPI (blue) and scale bars are 10  $\mu$ m.

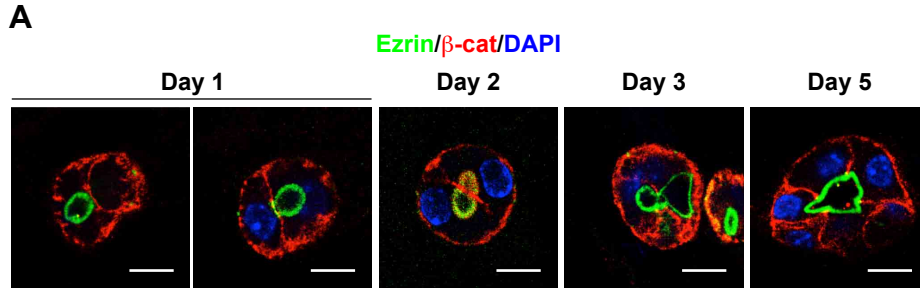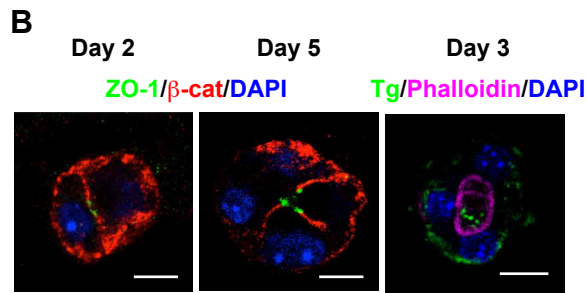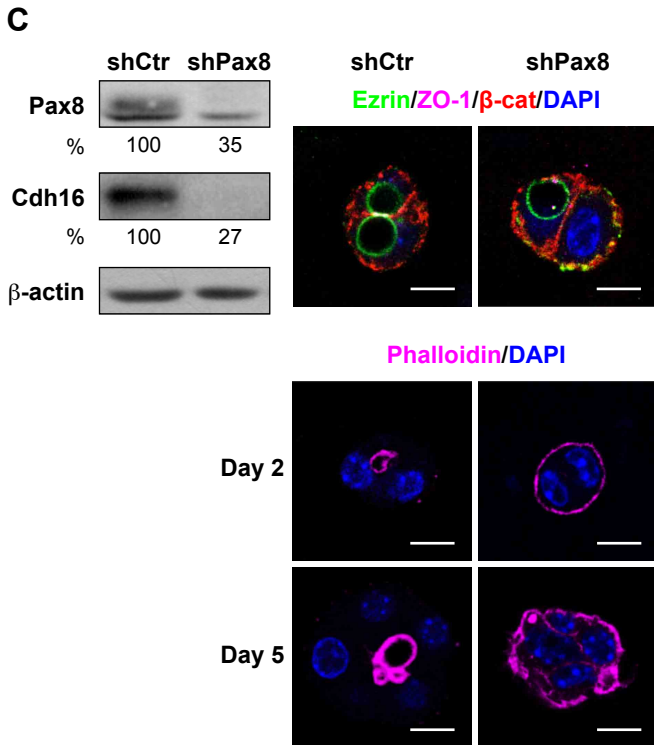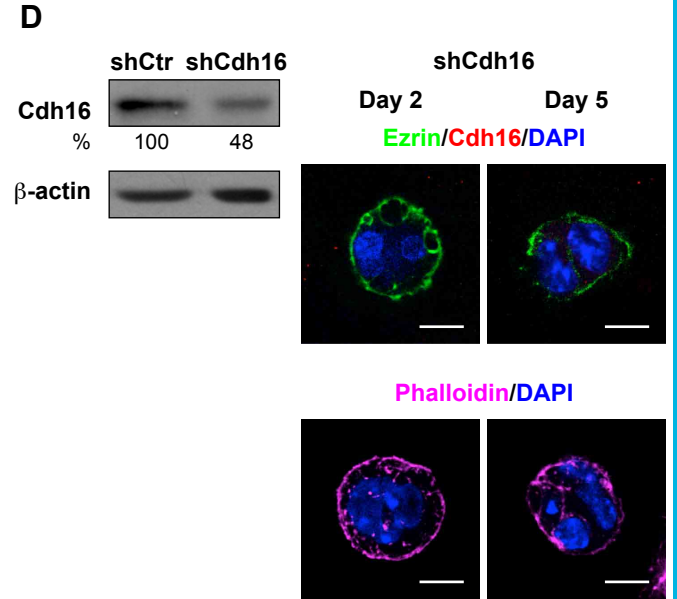

**Fig. S2. Three-dimensional follicle reorganization of mouse primary thyrocytes requires apical-basal polarization and *de novo* lumen formation that are under the Pax8-Cdh16 regulation pathway.** (A) Apical-basal polarization and lumen formation were observed in developing thyrocyte follicle-like structures. Structures were fixed at the indicated number of days and stained for Ezrin (green) and  $\beta$ -catenin (red). Representative confocal middle z-sections are shown. (B) Membrane polarization and thyroid differentiation in representative thyrocyte follicle-like structures at the indicated time points of culture. Structures were stained for ZO-1 (magenta) and  $\beta$ -catenin (red) (Day 2 and 5), thyroglobulin (Tg, green) and phalloidin (magenta) (Day 3). (C) Pax8 silencing disrupts apical membrane orientation, lumen formation and polarized actin organization in thyrocyte 3D structures. Left panels: Protein expression levels of Pax8 and Cdh16 in control primary thyrocytes (shCtr) and primary thyrocytes silenced for Pax8 (shPax8). Lysates were also immunoblotted for  $\beta$ -actin to ensure equal loading. Protein levels were quantified as percentages relative to shCtr expression levels. Right panels: (upper) Apical-basal polarization in shCtr and shPax8 thyrocytes grown for 2 days in 3D Matrigel culture. Representative single confocal sections through the middle of follicles stained for polarity markers: Ezrin (green), ZO-1 (magenta) and  $\beta$ -catenin (red); (lower) Actin filaments distribution in shCtr and shPax8 thyrocytes grown for 2 and 5 days in 3D Matrigel culture. Representative single confocal sections through the middle of structures stained for phalloidin (magenta). (D) Left panels: Protein expression of Cdh16 in primary thyrocytes after silencing of Cdh16 (shCdh16). Lysates were also immunoblotted for  $\beta$ -actin to ensure equal loading. Protein levels were quantified as percentages relative to control (shCtr) expression levels. Right panels: Representative single confocal sections of shCtr and shCdh16 structures at 2 and 5 days of growth in Matrigel stained for Ezrin (green), Cdh16 (red), and phalloidin (magenta). All nuclei were stained with DAPI (blue) and scale bars are 10  $\mu$ m.

## SUPPLEMENTARY DATA

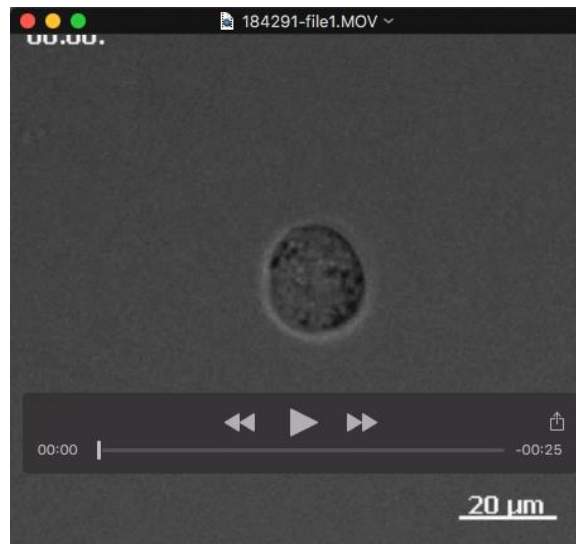

**Movie 1. Three-dimensional follicle morphogenesis.** A time-lapse movie of follicle formation was created from single FRT thyroid follicular cells grown in 3D Matrigel culture for seven days. Time frame, 40 min. Scale Bar is 20  $\mu\text{m}$ .

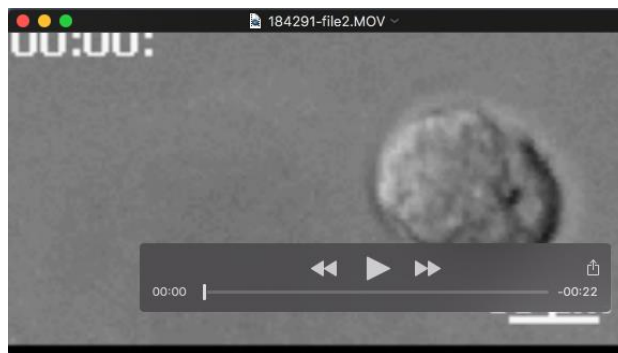

**Movie 2. Three-dimensional follicle morphogenesis.** A time-lapse movie of follicle formation was created from single mouse primary thyrocytes grown in 3D Matrigel culture for seven days. Time frame, 40 min. Scale Bar is 10  $\mu\text{m}$ .

**Table S1. Differentially expressed 3D vs. 2D genes.** Excel file containing the upregulated (red) and downregulated genes (green) in alphabetical order.

[Click here to Download Table S1](#)

**Table S2. KEGG gene set enrichment analysis.** Excel file containing the biological processes overrepresented among upregulated (positive) and downregulated (negative) probes for 3D vs. 2D comparison.

[Click here to Download Table S2](#)

**Table S3. Differentially expressed 3D vs. 2D genes related to epithelial tubulogenesis.** List of probes over-represented among a gene set of epithelial tubulogenesis. FDR=0.008

[Click here to Download Table S3](#)

**Table S4. Differentially expressed 3D vs. 2D genes involved in 3D MDCK cyst formation.** List of probes over-represented among a gene set of 3D MDCK cyst morphogenesis. (FDR=0.002)

[Click here to Download Table S4](#)

**Table S5. KEGG functional analysis.** Excel file containing genes upregulated in 3D vs. 2D condition distributed in different biological processes according to KEGG annotations.

[Click here to Download Table S5](#)

**Table S6. List of antibodies and dyes used in immunofluorescence (IF) and western blotting (WB)**

| <b>Primary Ab</b>           | <b>Cat. Number</b> | <b>Commercial source</b>                      | <b>Dilution</b>         |
|-----------------------------|--------------------|-----------------------------------------------|-------------------------|
| Ezrin                       | MS-661-P0          | Thermo Fisher Scientific, Waltham, MA, USA    | 1:500 (IF)              |
| β-catenin                   | 1496-R             | Santa Cruz Biotechnology, Santa Cruz, CA, USA | 1:500 (IF)              |
| ZO-1                        | 33725              | Santa Cruz Biotechnology, Santa Cruz, CA, USA | 1:200 (IF)              |
| GM130                       | 610822             | BD Biosciences, Bedford, MA, USA              | 1:100 (IF)              |
| Pax8                        | PA0300             | Biopat, Milan, Italy                          | 1:2000 (WB)             |
| Cdh16                       | 15107              | Protein Tech Group Inc., Chicago, IL, USA     | 1:100 (IF), 1:1000 (WB) |
| GFP                         | 6455               | Invitrogen, Carlsbad, CA, USA                 | 1:200 (IF)              |
| β-actin                     | 1616-R             | Santa Cruz Biotechnology                      | 1:1000 (WB)             |
| Acetylated tubulin          | T6793              | Sigma-Aldrich, St Louis, MO, USA              | 1:500 (IF)              |
| Ki67                        | NCL-Ki67-MM1       | Novocastra Laboratories Ltd., Newcastle, UK   | 1:100 (IF)              |
| Cleaved caspase-3           | 9661               | Cell Signaling Technology, Danvers, MA, USA   | 1:500 (IF)              |
| Laminin-332                 | 14509              | Abcam PLC, Cambridge, UK                      | 1:200 (IF)              |
| Itgb1 (N20)                 | 6622               | Santa Cruz Biotechnology, Santa Cruz, CA, USA | 1:500 (WB)              |
| Tg                          | A0251              | Dako-Agilent, Santa Clara, California, USA    | 1:1000 (IF)             |
| <b>Secondary Ab</b>         | <b>Cat. Number</b> | <b>Commercial source</b>                      | <b>Dilution</b>         |
| Alexa Fluor anti-rabbit 488 | A11034             | Invitrogen, Molecular Probes                  | 1:500                   |
| Alexa Fluor anti-mouse 546  | A11030             | Invitrogen, Molecular Probes                  | 1:500                   |
| Alexa Fluor anti-rat 647    | A21247             | Invitrogen, Molecular Probes                  | 1:500                   |
| Goat anti-mouse IgG-HRP     | 2005               | Santa Cruz Biotechnology                      | 1:2000                  |
| Goat anti-rabbit IgG-HRP    | 2004               | Santa Cruz Biotechnology                      | 1:2000                  |
| <b>Dyes</b>                 | <b>Cat. Number</b> | <b>Commercial source</b>                      | <b>Dilution</b>         |
| Phalloidin 647              | A22287             | Invitrogen, Molecular Probes                  | 1:40                    |
| DAPI                        | D1306              | Invitrogen, Molecular Probes                  | 1:10,000                |
| PAS-Hematoxylin KIT         | 395                | Sigma-Aldrich, St Louis, MO, USA              | Standard procedure      |



**Table S7. List of rat primers, oligonucleotide sequences and primer efficiency (%) used in q-PCR**

| Gene   | Oligonucleotide sequence       | Efficiency (%) |
|--------|--------------------------------|----------------|
| Pax8   | F: 5´-GGACAGTTGTCTGACTGAGCA-3´ | 99.7           |
|        | R: 5´-GAATGAGGATCTGCCACCAC-3´  |                |
| Cdh16  | F: 5´-TTCCTGGAGGTTTCTGATGG-3´  | 97             |
|        | R: 5´-AAAGGCTGAACTGGGAACTG-3´  |                |
| Myo5b  | F: 5´-AGTGGGGATGAGGGTTTCAT-3´  | 99.1           |
|        | R: 5´-TTCCAGCATGGCAGAACTA-3´   |                |
| Rab17  | F: 5´-AACACCATTGCCCAGGAG-3´    | 98.2           |
|        | R: 5´-AGGCTGAGCTATCCTCCAC-3´   |                |
| Wnt4   | F: 5´-GCTGTACCTGGCCAAGCTGT-3´  | 97.4           |
|        | R: 5´-GAACTGGTACTGGCACTCCTC-3´ |                |
| Duox2  | F: 5´-CATGCTGCGCGACCACGACA-3´  | 100.4          |
|        | R: 5´-TACAGCCGGGGAGAGGGAGC-3´  |                |
| Polr2g | F: 5´-GCAGGACGATGAGATACGCT-3´  | 99.1           |
|        | R: 5´-ATCAAAGCAAGCTGGAGGCT-3´  |                |
| Lamb1  | F: 5´-GTGGAAGGAATGGTTCATGG-3´  | 98.5           |
|        | R: 5´-AATCCATGCACAGCTCACAG-3´  |                |
| Lamb2  | F: 5´-GCAAATTGTGTGCCACTGTC-3´  | 99.1           |
|        | R: 5´-TCAATGTTCCCCTGCACTC-3´   |                |
| Lamb3  | F: 5´-CCAAAGGTGTGACTGCAATG-3´  | 97.8           |
|        | R: 5´-TTGGCTAGCAGCAAACACAG-3´  |                |
| Lamc1  | F: 5´-AATCTCGGACTTTGCTGTGG-3´  | 99.2           |
|        | R: 5´-GAAAGGCAGGCACTTTTCAC-3´  |                |
